# Supplementary material for: A high-sucrose diet causes microbiota composition shift and promotes the susceptibility of mice to Salmonella Typhimurium infection
Source: Royal Society of Chemistry journal article supplement (doi:10.1039/d2fo03467k), 2023-01-01
Supplement: d2fo03467k1.pdf [file d2fo03467k1.pdf]

## 1 Supplementary Tables

### 2 Supplementary Table S1. Composition of experimental diets.

| Diet/           | Chow diet<br>(Control) | High sucrose diet<br>(HSD) |
|-----------------|------------------------|----------------------------|
| Ingredient      | gm                     | gm                         |
| Casein          | 200                    | 200                        |
| Corn Starch     | 397.486                | 97.486                     |
| Maltodextrin    | 132                    | 132                        |
| Sucrose         | 100                    | 400                        |
| Soybean Oil     | 70                     | 70                         |
| Cellulose       | 50                     | 50                         |
| Minerals        | 35                     | 35                         |
| Vitamin Mix     | 10                     | 10                         |
| L-Cystine       | 3                      | 3                          |
| Choline         | 2.5                    | 2.5                        |
| Bitartrate      | 2.5                    | 2.5                        |
| TBHQ            | 0.014                  | 0.014                      |
| Sodium chloride | 0                      | 0                          |
| Total           | 1000                   | 1000                       |

3 Chow diet: a purified feed (AIN-93G) for rodent laboratory animals issued by the

4 American Nutrition Society.

5

---

6

7 **Supplementary Table S2. Primers used for transcriptomic analysis**

---

| <b>Primers</b>                 | <b>Forward</b>           | <b>Reverse</b>          |
|--------------------------------|--------------------------|-------------------------|
| <b>GAPHD</b>                   | ATTGTCAGCAATGCATCCTG     | ATGGACTGTGGTCATGAGCC    |
| <b>MUC2</b>                    | GCTGACGAGTGGTTGGTGAATG   | GATGAGGTGGCAGACAGGAGAC+ |
| <b>Claudin3</b>                | CATCGGCAGCAGCATCATCAC□   | ACGATGGTGATCTTGGCCTTGGp |
| <b>ZO-1</b>                    | GACCTTGAGCAGCCGTCATA     | CCGTAGGCGATGGTCATAGTT   |
| <b>Ocludin</b>                 | CAGCCTTCTGCTTCATCG       | GTCGGGTTCACTCCCATTA     |
| <b>Reg3<math>\gamma</math></b> | AAGCTTCCTTCCTGTCCTCC     | TCCACCTCTGTTGGGTTTCAT   |
| <b>Reg3<math>\beta</math></b>  | GGCTTCATTCTTGTCTCCA      | TCCACCTCCATTGGGTTCT     |
| <b>Caspase-1</b>               | CAAGGTGATCATTATTCAGGCATG | CAATGAAAAGTGAGCCCCTGA   |
| <b>Caspase-8</b>               | AACTGGGCAGTGAAGACCTG.    | CCCACCGACTGATGTGGAAA    |
| <b>Caspase-11</b>              | AAGCTGATGCTGTCAAGCTG     | ATGATTGTTGCACCTTCAGGA   |

---

8
